# Supplementary material for: Complete degradation of 2,4-dichlorophenol in a sequential sulfidated nanoscale zero-valent iron/peroxydisulfate system: dechlorination, mineralization and mechanism
Source: Royal Society of Chemistry journal article supplement (doi:10.1039/d4en00737a), 2024-11-23
Supplement: d4en00737a1.pdf [file d4en00737a1.pdf]

## Supporting Information

### **Complete degradation of 2,4-dichlorophenol in sequential sulfidated nanoscale zero-valent iron/peroxydisulfate system: Dechlorination, mineralization and mechanism**

Zhoujie Pi <sup>a, 1\*</sup>, Puyu Zhou <sup>b, c, 1</sup>, Kun Luo <sup>d</sup>, Li He <sup>b, c</sup>, Shengjie Chen <sup>b, c</sup>, Zhu Wang <sup>b, c</sup>, Shanshan Zhang <sup>b, c</sup>, Xiaoming Li <sup>b, c</sup>, Qi Yang <sup>b, c, \*</sup>

<sup>a</sup> College of Urban and Environmental Sciences, Key Laboratory of urban water safety discharge and resource utilization of Hunan province, Hunan University of Technology, 88 Taishan Road, Zhuzhou, 412007, P.R. China

<sup>b</sup> College of Environmental Science and Engineering, Hunan University, Changsha 410082, P.R. China

<sup>c</sup> Key Laboratory of Environmental Biology and Pollution Control (Hunan University), Ministry of Education Changsha 410082, P.R. China

<sup>d</sup> Department of Biological and environmental engineering, Changsha University, Changsha, 410003, P.R. China

<sup>1</sup>These authors contribute equally to this article

Corresponding author at: College of Urban and Environmental Sciences, Hunan University of Technology, Zhuzhou, Hunan 412007, China; College of Environmental Science and Engineering, Hunan University, Changsha, Hunan 410082, China.

E-mail address: [pizhoujie@hut.edu.cn](mailto:pizhoujie@hut.edu.cn) (Zhoujie Pi), [yangqi@hnu.edu.cn](mailto:yangqi@hnu.edu.cn) (Qi Yang)

Phone & Fax: +86-0731-8882-2829

## **Text S1 GC-MS method**

The intermediate product samples of 2,4-DCP degradation process were analyzed by Gas chromatography-mass spectrometry (GC-MS) through liquid-liquid extraction pretreatment. 30 mL of samples and 10 mL of dichloromethane were mixed in a liquid separation funnel, and the pH of the mixed solutions was adjusted to 2.0, 7.0 and 12.0 by H<sub>2</sub>SO<sub>4</sub> and HCl, respectively. After three oscillations of extraction, the underlying liquid is collected for subsequent use. The collected solution was evaporated and concentrated to 5 mL and filtered by 0.22 μm organic filter. The obtained solution was diluted and transferred to 2 mL injection bottle for testing. HP5 capillary column (30 m×0.25 mm×0.25 μm) was used for the chromatography. 2 μL of samples was injected within 2 min without diffluent. The scanning mass range was 60-400 amu, and the carrier gas flow rate was 1.0 mL·min<sup>-1</sup>, and the solvent delay time was 7 min. The heating procedure of column temperature is as follows: Initial temperature 40°C, maintaining for 8 min; The temperature was raised to 260°C at a gradient of 20°C per minute and maintained for 20 min. The inlet temperature is 260°C, the ion source temperature is 230°C, and the electron energy is 70 eV. Due to the different charge-mass ratio of each chemical substance, the time of ion peak is different, and the corresponding chemical substance can be obtained by referring to the database comparison.

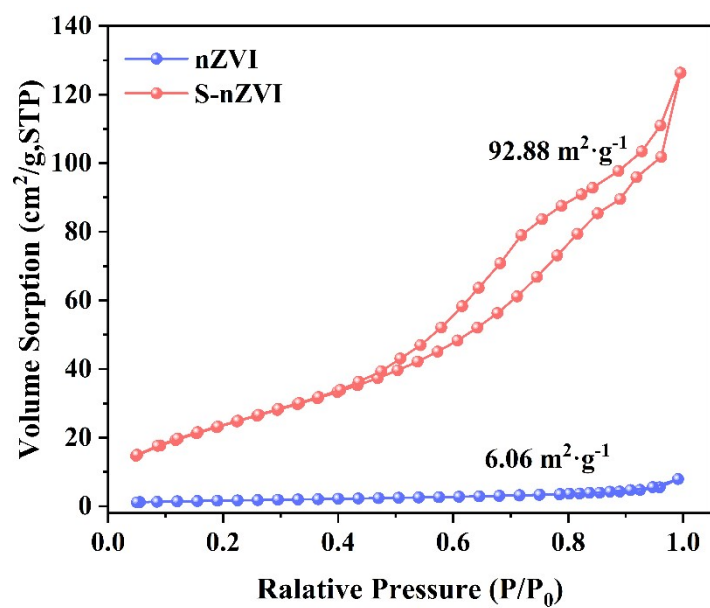

**Figure S1.** The N<sub>2</sub> adsorption-desorption isotherms of nZVI and S-nZVI.

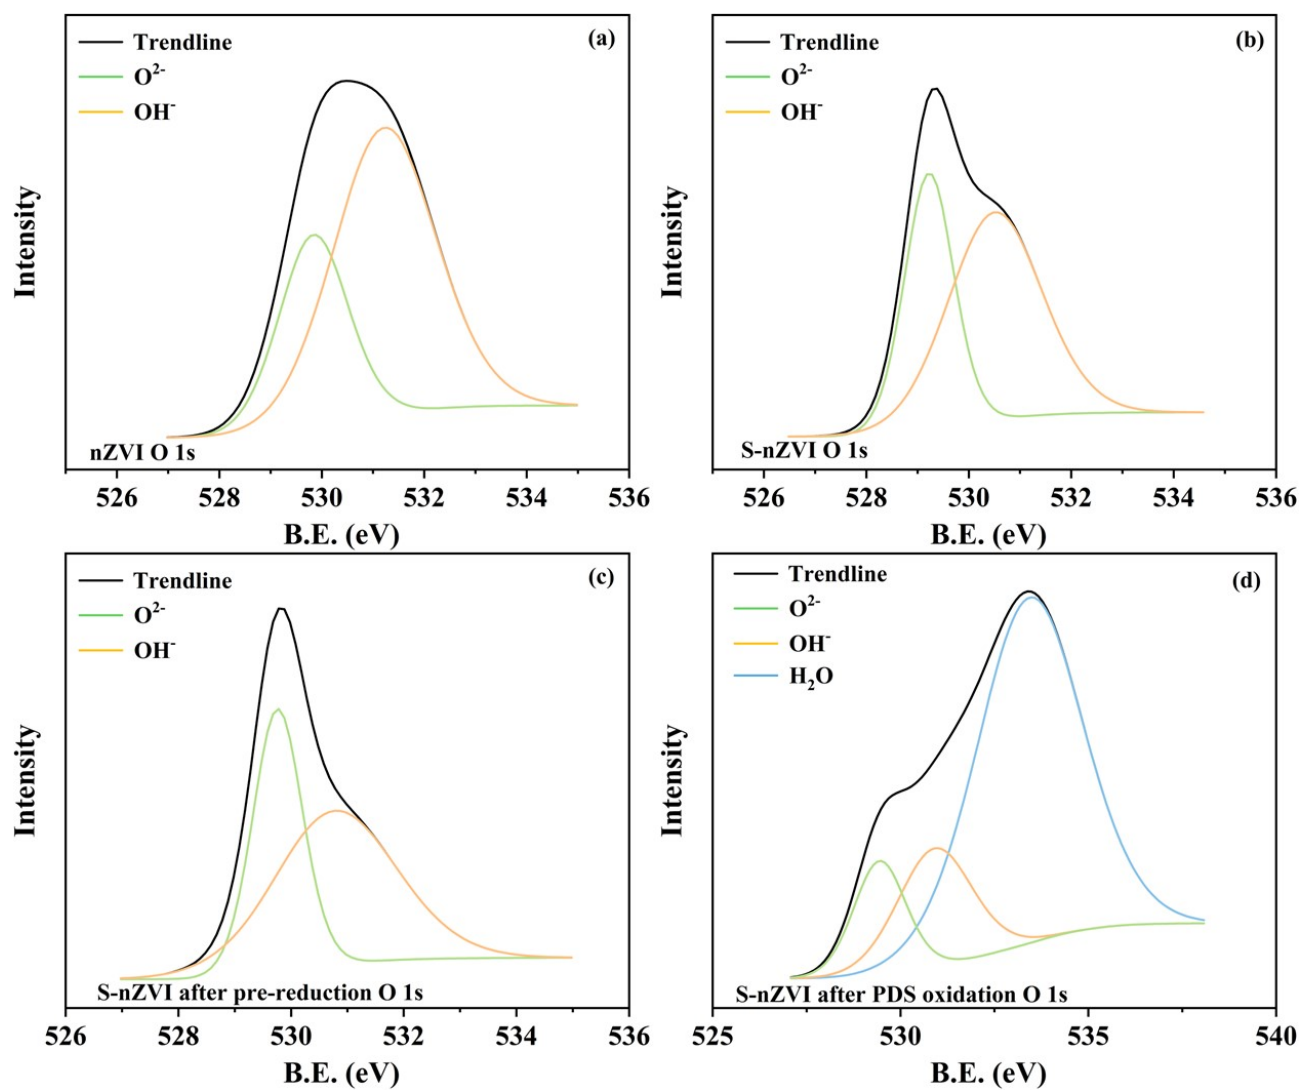

**Figure S2.** O (1s) high resolution of nZVI (a), S-nZVI (b), S-nZVI after pre-reduction (c), S-nZVI after PDS oxidation (d).

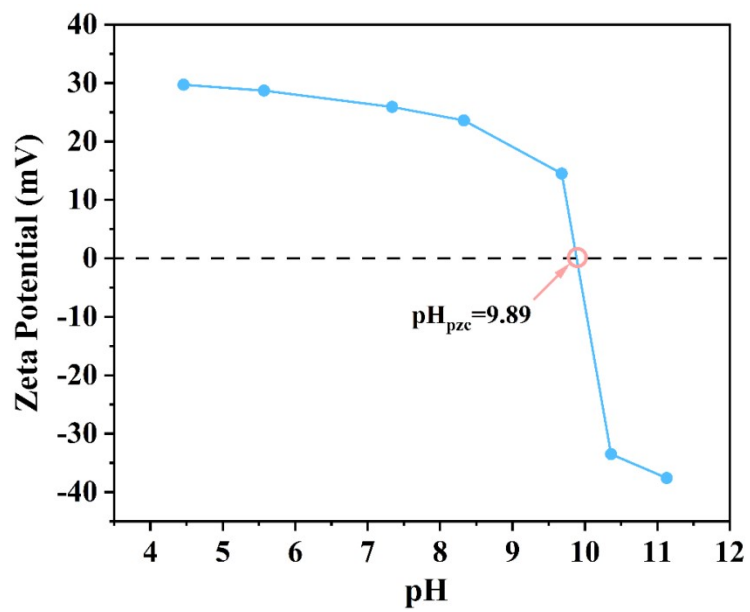

Figure S3. The Zeta potential of S-nZVI.

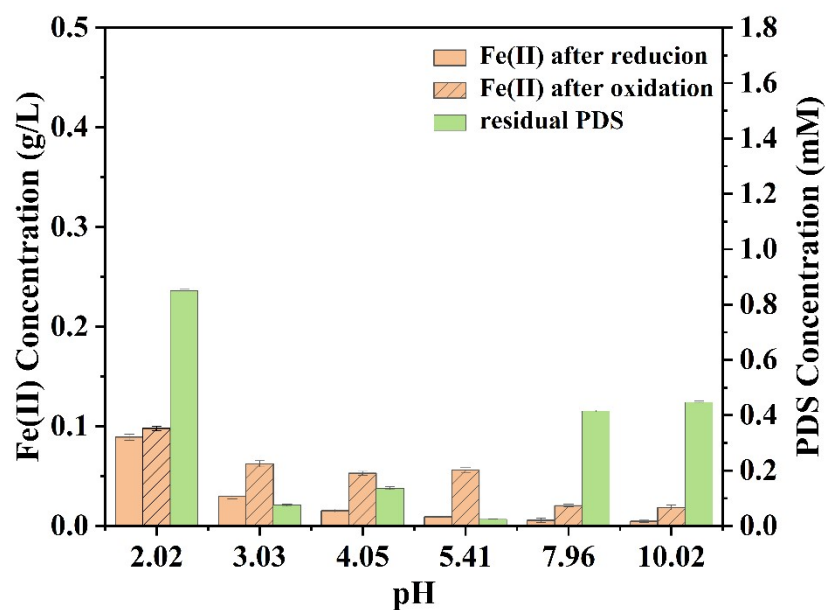

**Figure S4.** Residual PDS concentration and Fe(II) concentration after reduction and oxidation under different pH value. (Reaction conditions: S-nZVI dosage=  $2.5 \text{ g}\cdot\text{L}^{-1}$ ,  $[\text{PDS}] = 1.8 \text{ mM}$ ,  $[\text{2,4-DCP}] = 10 \text{ mg}\cdot\text{L}^{-1}$ )

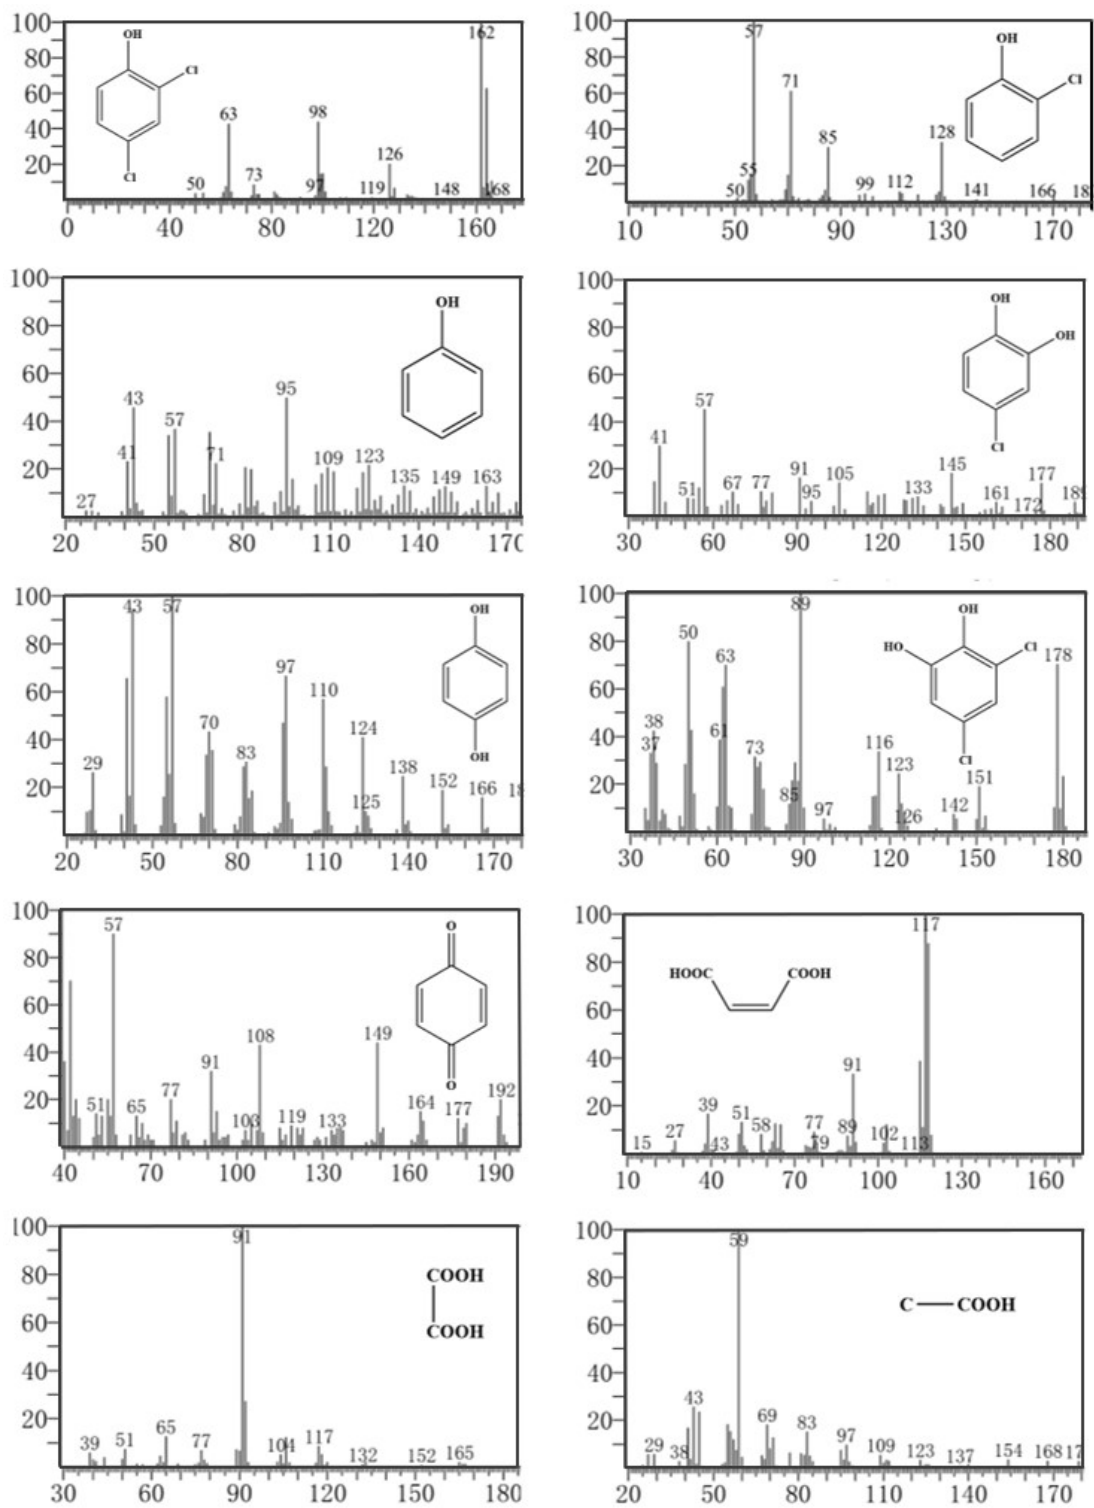

**Figure S5.** The mass spectra of the intermediates of 2,4-DCP.

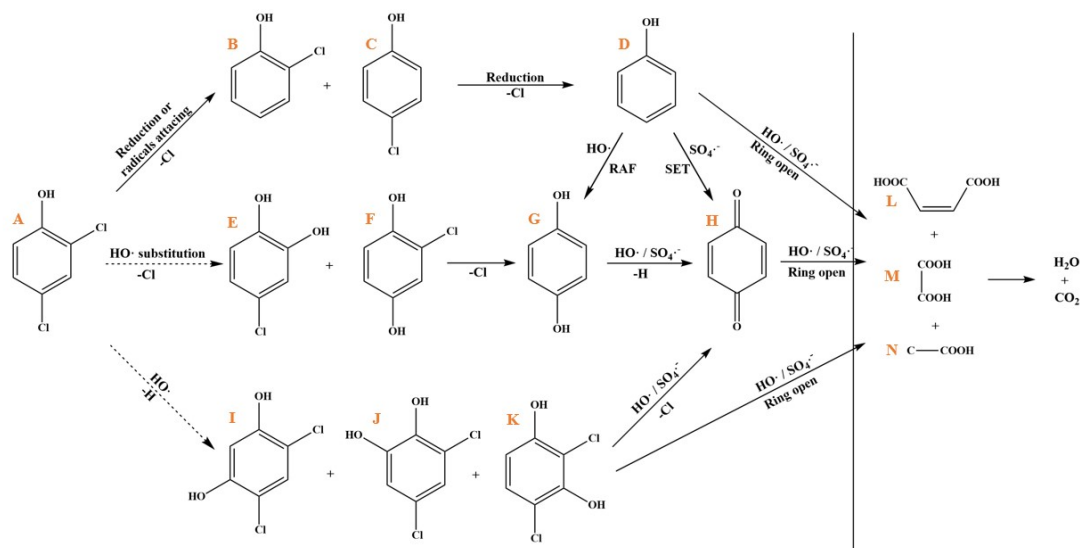

**Figure S6.** Degradation pathways of 2,4-DCP in sequential S-nZVI/PDS system.



**Table S1.** Preparation of S-nZVI with different Fe/S

| Fe/S                                          | 40       | 60       | 80       | 100      |
|-----------------------------------------------|----------|----------|----------|----------|
| FeCl <sub>3</sub> ·6H <sub>2</sub> O          | 3.3788 g | 3.3788 g | 3.3788 g | 3.3788 g |
| Na <sub>2</sub> S <sub>2</sub> O <sub>4</sub> | 0.2720 g | 0.1814 g | 0.1360 g | 0.1088 g |
| NaBH <sub>4</sub>                             | 1.8915 g | 1.8915 g | 1.8915 g | 1.8915 g |

**Table S2.** Water quality parameters of different water bodies.

| Types                                               | Milli-Q water | Tap water | Peach lake water |
|-----------------------------------------------------|---------------|-----------|------------------|
| Initial pH                                          | 5.83          | 7.31      | 7.08             |
| TOC (mg·L <sup>-1</sup> )                           | NA            | 5.75      | 19.06            |
| Cl <sup>-</sup> (mg·L <sup>-1</sup> )               | NA            | 13.63     | 10.91            |
| SO <sub>4</sub> <sup>2-</sup> (mg·L <sup>-1</sup> ) | NA            | 28.47     | 16.37            |
